# Supplementary material for: Prognostic Significance of Concurrent Hypovascular and Hypervascular Nodules in Patients with Hepatocellular Carcinoma
Source: PubMed Central journal article supplement (PMC5029907; doi:10.1371/journal.pone.0163119), 2016-09-20
Supplement: pone.0163119.s003.pdf [file pone.0163119.s003.pdf]

**S1 Table.** Characteristics of initial recurrence

|                                                                  | <b>Hypervascular<br/>HCC only<br/>(Group A)</b> | <b>Hypovascular nodules<br/>co-existing with<br/>hypervascular HCC<br/>(Group B)</b> | <b><i>P</i></b> |
|------------------------------------------------------------------|-------------------------------------------------|--------------------------------------------------------------------------------------|-----------------|
| <b>Number of recurrences</b>                                     | 72                                              | 36                                                                                   |                 |
| <b>Stage at the time of initial recurrence, n (%)</b>            |                                                 |                                                                                      |                 |
| Within $\leq 3$ hypervascular HCC lesions that were $\leq 30$ mm | 47 (65)                                         | 25 (69)                                                                              | 0.829           |
| Beyond $\leq 3$ hypervascular HCC lesions that were $\leq 30$ mm | 25 (35)                                         | 11 (31)                                                                              |                 |
| <b>Child-Pugh class at the time of initial recurrence, n (%)</b> |                                                 |                                                                                      |                 |
| A                                                                | 55 (76)                                         | 22 (61)                                                                              | 0.180           |
| B                                                                | 16 (22)                                         | 12 (33)                                                                              |                 |
| C                                                                | 1 (1)                                           | 2 (6)                                                                                |                 |
| <b>Treatment of initial recurrence, n (%)</b>                    |                                                 |                                                                                      |                 |
| Local ablation                                                   | 39 (54)                                         | 19 (53)                                                                              | 0.951           |
| TACE                                                             | 24 (33)                                         | 13 (36)                                                                              |                 |
| Others                                                           | 9 (13)                                          | 4 (11)                                                                               |                 |

Abbreviations: HCC, hepatocellular carcinoma; TACE, transcatheter arterial chemoembolization
