# Supplementary material for: Prognostic Significance of Concurrent Hypovascular and Hypervascular Nodules in Patients with Hepatocellular Carcinoma
Source: PubMed Central journal article supplement (PMC5029907; doi:10.1371/journal.pone.0163119), 2016-09-20
Supplement: pone.0163119.s004.pdf [file pone.0163119.s004.pdf]

**S2 Table.** Treatment of clinical course of hepatocellular carcinoma

|                                                                | <b>Hypervascular<br/>HCC only<br/>(Group A)</b> | <b>Hypovascular nodules<br/>co-existing with<br/>hypervascular HCC<br/>(Group B)</b> | <b><i>P</i></b> |
|----------------------------------------------------------------|-------------------------------------------------|--------------------------------------------------------------------------------------|-----------------|
| <b>Total number of treatment, n (%)</b>                        |                                                 |                                                                                      |                 |
| ≤ 3                                                            | 61 (57)                                         | 24 (53)                                                                              | 0.722           |
| > 3                                                            | 46 (43)                                         | 21 (47)                                                                              |                 |
| Median (range)                                                 | 3 (1–9)                                         | 3 (1–11)                                                                             |                 |
| <b>Local ablation (excluding initial<br/>treatment), n (%)</b> |                                                 |                                                                                      |                 |
| Absent                                                         | 39 (36)                                         | 19 (42)                                                                              | 0.584           |
| Present                                                        | 68 (64)                                         | 26 (58)                                                                              |                 |
| <b>TACE, n (%)</b>                                             |                                                 |                                                                                      |                 |
| Absent                                                         | 50 (47)                                         | 20 (44)                                                                              | 0.859           |
| Present                                                        | 57 (53)                                         | 25 (56)                                                                              |                 |
| <b>Others, n (%)</b>                                           |                                                 |                                                                                      |                 |
| Absent                                                         | 83 (78)                                         | 39 (83)                                                                              | 0.265           |
| Present                                                        | 24 (22)                                         | 6 (17)                                                                               |                 |
| <b>Cause of death, n (%)</b>                                   |                                                 |                                                                                      |                 |
| HCC                                                            | 28 (26)                                         | 14 (31)                                                                              | 0.555           |
| Liver dysfunction                                              | 13 (12)                                         | 10 (22)                                                                              | 0.138           |
| Others                                                         | 18 (17)                                         | 14 (31)                                                                              | 0.080           |

Abbreviations: HCC, hepatocellular carcinoma; TACE, transcatheter arterial chemoembolization
