# Supplementary material for: Prognostic Significance of Concurrent Hypovascular and Hypervascular Nodules in Patients with Hepatocellular Carcinoma
Source: PubMed Central journal article supplement (PMC5029907; doi:10.1371/journal.pone.0163119), 2016-09-20
Supplement: pone.0163119.s005.pdf [file pone.0163119.s005.pdf]

**S3 Table.** Univariate analysis based on the contribution of hypovascular nodule prognosis

| Variables                                       | Univariate analysis |             | <i>P</i> |
|-------------------------------------------------|---------------------|-------------|----------|
|                                                 | Hazard ratio        | 95% CI      |          |
| <b>Gender, male</b>                             |                     |             |          |
| Absent                                          | Reference           |             |          |
| Present                                         | 1.286               | 0.802–2.062 | 0.296    |
| <b>Age, &gt; 67 years</b>                       |                     |             |          |
| Absent                                          | Reference           |             |          |
| Present                                         | 1.444               | 0.964–2.163 | 0.075    |
| <b>HBs-Ag positive</b>                          |                     |             |          |
| Absent                                          | Reference           |             |          |
| Present (treated by NA)                         | 1.187               | 0.547–2.576 | 0.665    |
| Present                                         | 0.180               | 0.024–1.337 | 0.094    |
| <b>HCV-Ab positive</b>                          |                     |             |          |
| Absent                                          | Reference           |             |          |
| Present                                         | 1.637               | 0.908–2.952 | 0.101    |
| <b>Child–Pugh B</b>                             |                     |             |          |
| Absent                                          | Reference           |             |          |
| Present                                         | 1.770               | 1.091–2.873 | 0.021    |
| <b>Multiple or &gt; 20-mm hypervascular HCC</b> |                     |             |          |
| Absent                                          | Reference           |             |          |
| Present                                         | 1.392               | 0.924–2.098 | 0.114    |
| <b>AFP, &gt; 100 ng/mL</b>                      |                     |             |          |
| Absent                                          | Reference           |             |          |
| Present                                         | 1.006               | 0.600–1.685 | 0.983    |
| <b>Initial local therapy, PEI</b>               |                     |             |          |
| RFA                                             | Reference           |             |          |
| PEI                                             | 1.246               | 0.830–1.872 | 0.288    |
| <b>Hypovascular nodules</b>                     |                     |             |          |
| Absent                                          | Reference           |             |          |
| Present                                         | 2.072               | 1.364–3.148 | 0.001    |

Abbreviations: HBs-Ag, hepatitis B surface antigen; NA, nucleos(t)ide analogue; HCV-Ab, hepatitis C virus antibody; HCC, hepatocellular carcinoma; AFP, alpha-fetoprotein; RFA, radiofrequency ablation; PEI, percutaneous ethanol injection
